# Supplementary material
Source: PubMed Central journal article supplement (PMC3938933)
Supplement: Supp_Fig1.pdf [file Supp_Fig1.pdf]

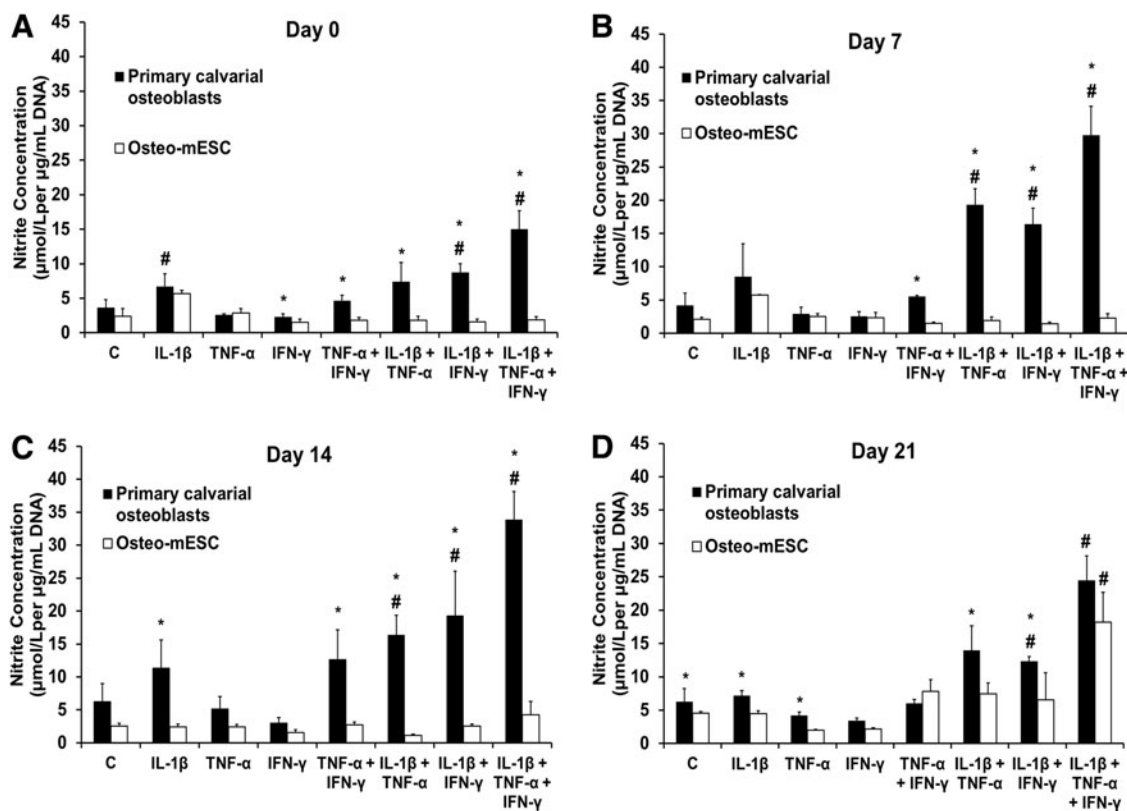

**SUPPLEMENTARY FIG. S1.** Nitric oxide production by cells treated with proinflammatory cytokines, measured as nitrite accumulation within the culture medium. Cells were treated with interleukin-1 $\beta$  (IL-1 $\beta$ ), tumor necrosis factor- $\alpha$  (TNF- $\alpha$ ), and interferon- $\gamma$  (IFN- $\gamma$ ) for 72 h at day 0 (**A**), day 7 (**B**), day 14 (**C**), or day 21 (**D**) of osteogenic culture. Nitrite concentration corrected for DNA content of producing cells measured by Hoechst assay. Values shown as mean  $\pm$  SEM for three separate experiments each with  $n=6$ . \*Statistical significance of primary osteoblast versus osteogenic differentiation of mouse embryonic stem cells (osteo-mESC) ( $P \leq 0.01$ ) #Statistical significance versus control of same cell type ( $P \leq 0.01$ ).
