# Supplementary material
Source: PubMed Central journal article supplement (PMC3938933)
Supplement: Supp_Fig2.pdf [file Supp_Fig2.pdf]

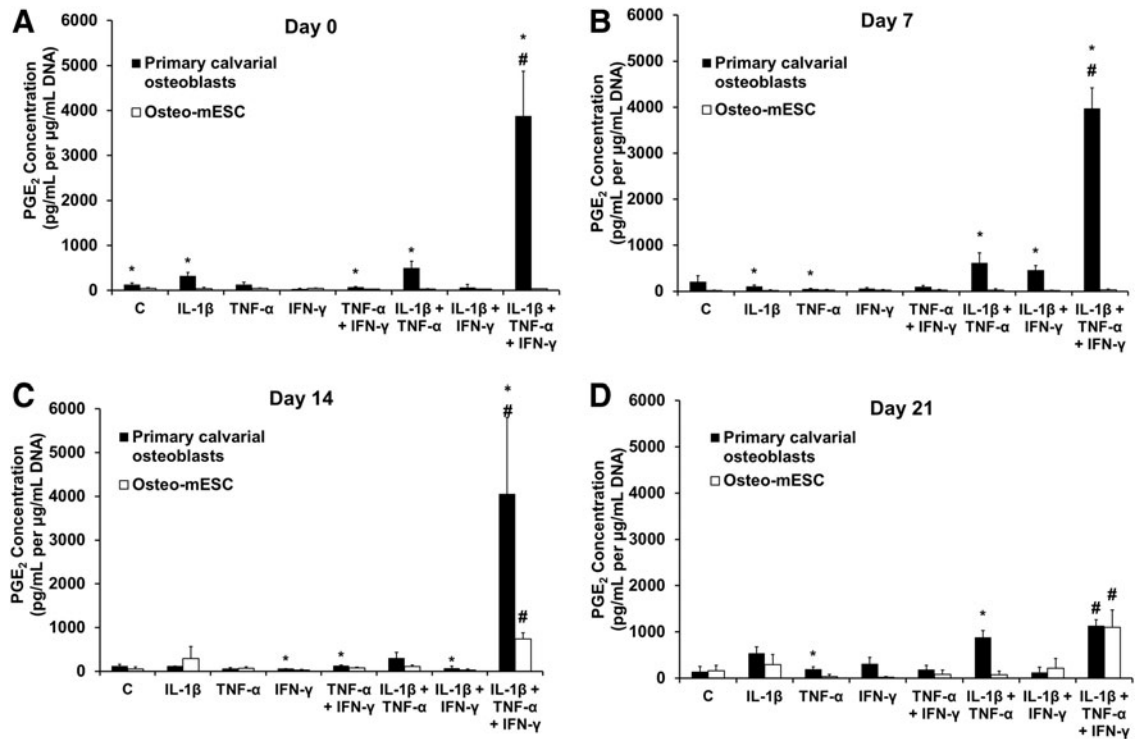

**SUPPLEMENTARY FIG. S2.** Prostaglandin E<sub>2</sub> (PGE<sub>2</sub>) production by cells treated with proinflammatory cytokines. Cells were treated with IL-1β, TNF-α, and IFN-γ for 72 h at day 0 (A), day 7 (B), day 14 (C), or day 21 (D) of osteogenic culture. PGE<sub>2</sub> concentration corrected for DNA content of producing cells measured by Hoechst assay. Values shown as mean ± SEM for three separate experiments each with *n*=3. \*Statistical significance of primary osteoblast versus osteo-mESC (*P* ≤ 0.01). #Statistical significance versus control of same cell type (*P* ≤ 0.01).
