# Supplementary material
Source: PubMed Central journal article supplement (PMC3938933)
Supplement: Supp_Table1.pdf [file Supp_Table1.pdf]

SUPPLEMENTARY TABLE S1. LIST OF ANTIBODIES

|                                            | <i>Antigen</i>       | <i>Source (catalogue #)</i>                      | <i>Host</i>                |
|--------------------------------------------|----------------------|--------------------------------------------------|----------------------------|
| Primary antibodies                         | Collagen-I           | Millipore (AB775P)                               | Rabbit                     |
|                                            | Cadherin-11          | R&D Systems (AF1433)                             | Goat                       |
|                                            | Osteocalcin          | Millipore (AB10911)                              | Rabbit                     |
|                                            | Osteopontin          | R&D Systems (AF1790)                             | Goat                       |
|                                            | iNOS                 | Thermo Scientific (PA1-37924)                    | Rabbit                     |
|                                            | COX-2                | Millipore (AB5118)                               | Rabbit                     |
|                                            | PGES                 | Sigma (T6079)                                    | Rabbit                     |
|                                            | Secondary antibodies | Anti-rabbit IgG (Alexa Fluor-488/546 conjugated) | Invitrogen (A21206/A10040) |
| Anti-goat IgG (Alexa Fluor-546 conjugated) |                      | Invitrogen (A11056)                              | Donkey                     |
| Anti-goat IgG (Biotinylated)               |                      | Vector (BA-5000)                                 | Rabbit                     |
